# Supplementary material for: Gorge Motions of Acetylcholinesterase Revealed by Microsecond Molecular Dynamics Simulations
Source: PubMed Central journal article supplement (PMC5468367; doi:10.1038/s41598-017-03088-y), 2017-06-12
Supplement: 41598_2017_3088_MOESM1_ESM.pdf [file 41598_2017_3088_MOESM1_ESM.pdf]

# Supporting Information

## Gorge Motions of Acetylcholinesterase Revealed by Microsecond Molecular Dynamics Simulations

Shanmei Cheng, Wanling Song, Xiaojing Yuan, Yechun Xu\*

CAS Key Laboratory of Receptor Research, Drug Discovery and Design Center,  
Shanghai Institute of Materia Medica, Chinese Academy of Sciences (CAS),  
Shanghai 201203, China.

### Table of Contents:

|                |            |
|----------------|------------|
| Figure S1..... | Page S2    |
| Figure S2..... | Page S3    |
| Figure S3..... | Page S4    |
| Table S1.....  | Page S5    |
| Table S2.....  | Page S6-10 |

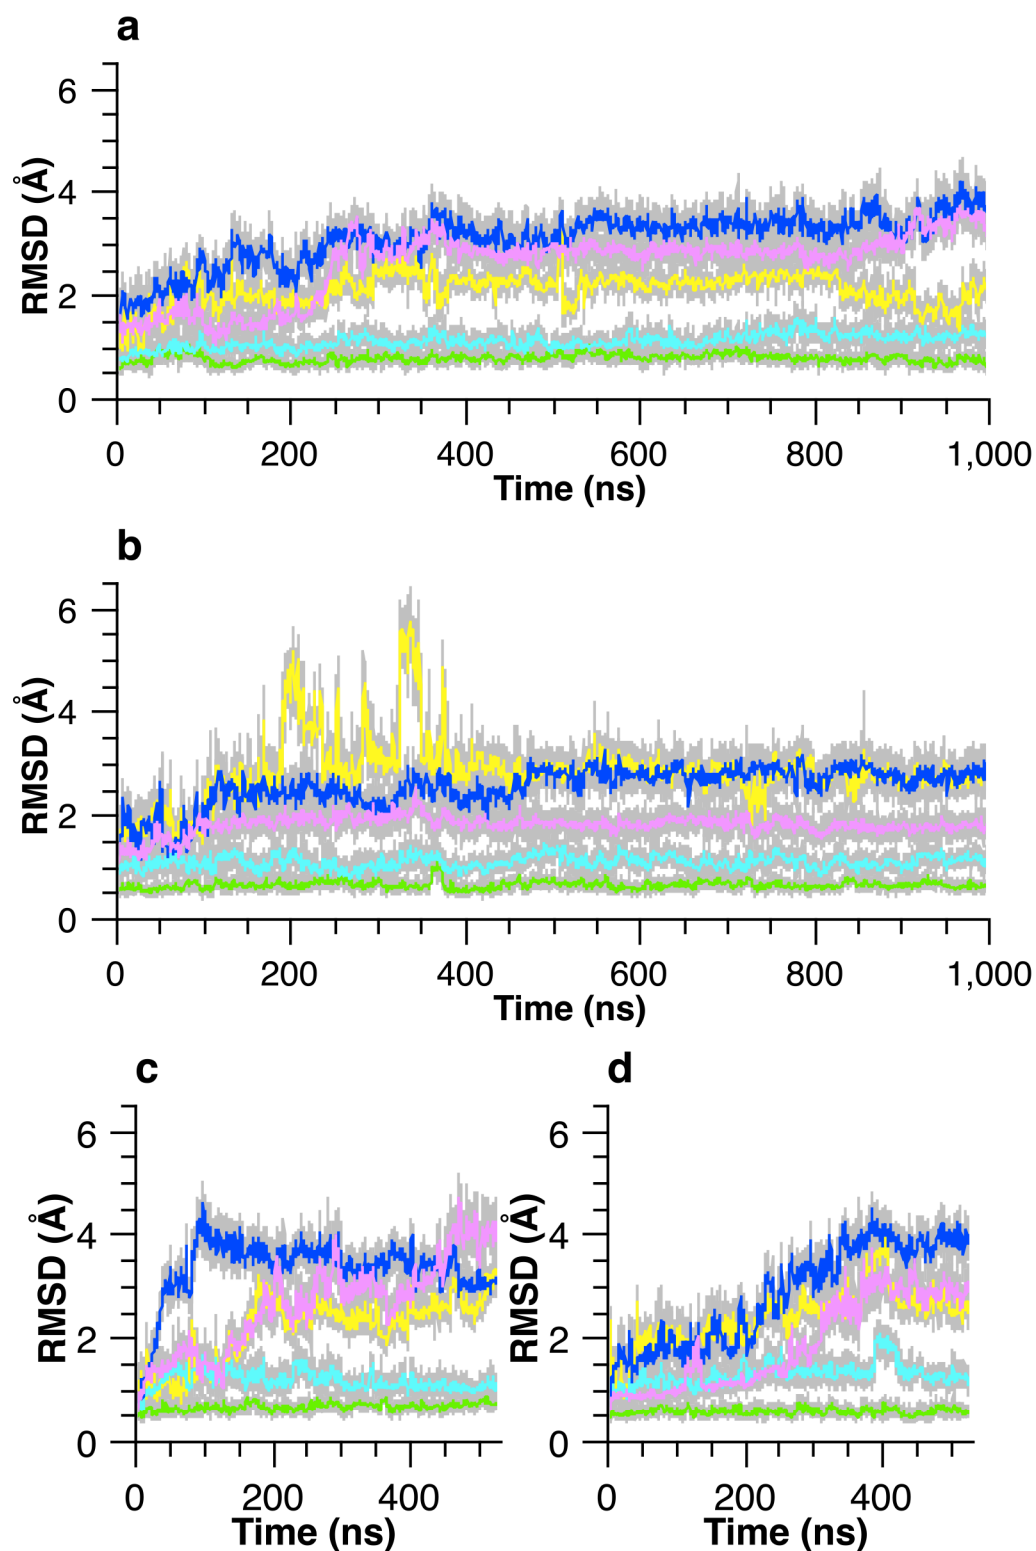

**Figure S1. Movements of five subdomains surrounding the active-site gorge.** Backbone RMSDs of the  $\Omega$ -Loop (yellow), S1 (green), S2 (cyan), S3 (blue), and S4 (magenta) versus time in simulations of the monomer (a), complex (b) and apo dimer (c, d).

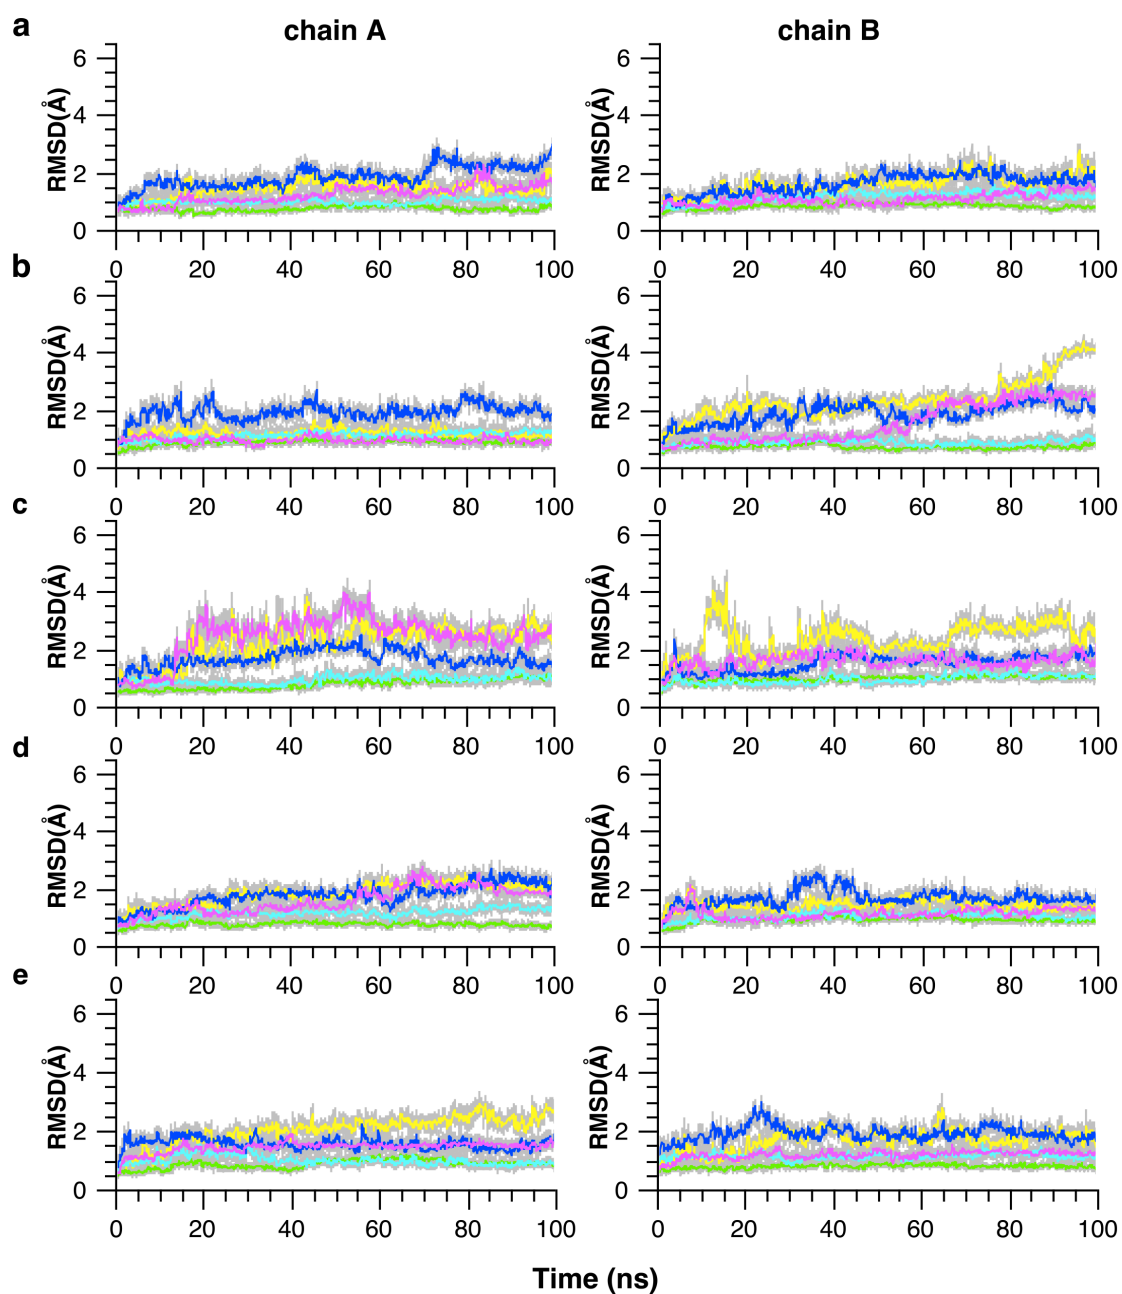

**Figure S2. Movements of five subdomains surrounding the active-site gorge in five 100-ns simulations of *TcAChE* dimer in complex with E2020. (a-e) Backbone RMSDs of the  $\Omega$ -Loop (yellow), S1 (green), S2 (cyan), S3 (blue), and S4 (magenta) versus time of the simulations.**

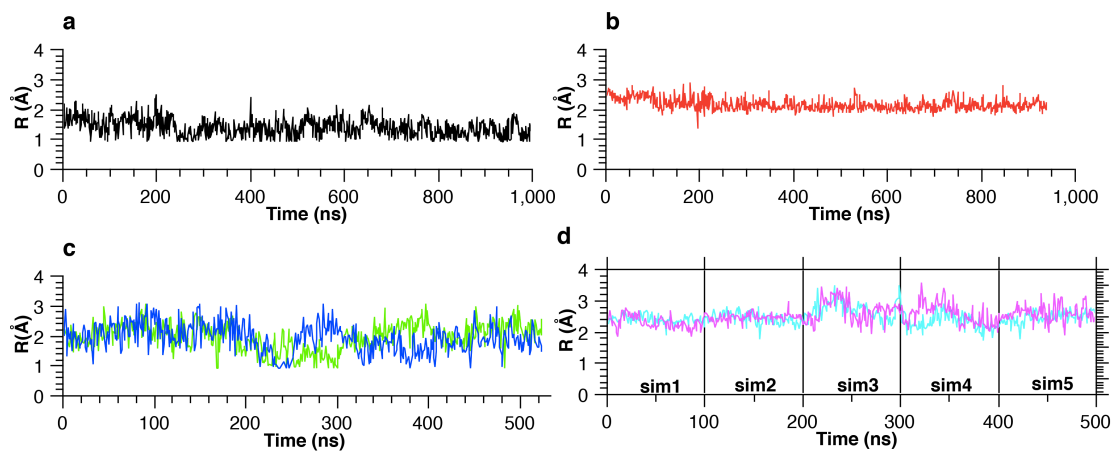

**Figure S3. Time-dependent minimal gorge radius (R) in simulations of the *TcAChE* monomer (a), the *TcAChE*-E2020 Complex (b), the apo dimer (c), and the complex dimer (d).**

**Table S1 Gorge residues with low  $|d|$  values and non-gorge residues with high  $|d|$  values.**

|                                     | <b>Gorge Residues (<math> d  &lt; 0.1 \text{ \AA}</math>)</b>      | <b>Non-gorge residues (<math> d  &gt; 0.4 \text{ \AA}</math>)</b>                                                                                                                                                                                                                    |
|-------------------------------------|--------------------------------------------------------------------|--------------------------------------------------------------------------------------------------------------------------------------------------------------------------------------------------------------------------------------------------------------------------------------|
| <b>Monomer</b>                      | E82, N280                                                          | R216, L321, G322, N364-V371, T376, G390-D393, L420, Y421, A427, P433-W435, G437, V438, F523, W524, F527-A534                                                                                                                                                                         |
| <b>Complex</b>                      | S226, S286, I287, R289, V400, E443                                 | N65, N87, I347-R349, D351, N364-L366, L368, D369, Y375, D380, D381, N424, H425, V438, D504-T507, W524-N533                                                                                                                                                                           |
| <b>Chain A of the Dimer</b>         | Y116, Y130, R244, V277, E278, N280-L282, G441                      | R88, I223, G322, V323, S340-S343, N416, Y421, V438, W473, A474, P482, N483, N488, E489, W492, P493, F523, A534                                                                                                                                                                       |
| <b>Chain B of the Dimer</b>         | L282, S286, N399, V400                                             | R47, P76, G77, E92, D93, G160, P337-K341, S343, E344, K346, D380-I385, N387, N429, L430, G437, V438                                                                                                                                                                                  |
| <b>Chain A of the Complex Dimer</b> | V71, S79, I115, G117-Y121, S124, Y130, Y148, V150, G198, A201-G203 | R216, S340-S345, R349, S359, V360, L373, Q374, D380, D381, I385, K386, R426, L430, V438                                                                                                                                                                                              |
| <b>Chain B of the Complex Dimer</b> | W114-Y116, I275-E278, P283                                         | R88, G322, V323, K341, S345, D365, L366, D369, A370, T372-D381, N383, I385, K386, R388, G390, D392, D393, G396-H398, I401, 410, N416, L420-H425, A427-L430, F446, P451, L452, Y458-A460, E463-I469, H471, W473, F502, I503, L505-T507, V512, R517, Q519, M520, V522, F523, Q526-T535 |

**Table S2. Residues included in communities resulted from the dynamic correlation analysis of the monomer (I), the complex (II), two chains of the apo (III-IV) and complex (V-VI) dimer.** Residues located at five subdomains are labeled with the same color as those shown in Fig. 1.

**I**

| #Community      | Residues                                                                                                                                                                         | Subdomains         |
|-----------------|----------------------------------------------------------------------------------------------------------------------------------------------------------------------------------|--------------------|
| C <sub>0</sub>  | N65, N66, C67-Q74, P76, G77, G80-M83, N85-C94, L95-N98, W114-L127, S145-S147, K269-W279                                                                                          | Ω-loop+S1+S2       |
| C <sub>1</sub>  | Y130-V144                                                                                                                                                                        | S1                 |
| C <sub>2</sub>  | P38-E49, Y148-V150, G151-V168, V236-G249, D259, I263-E268, V293-I296, D297-E299, F301                                                                                            | S1+S2              |
| C <sub>3</sub>  | L333-M353, S359, D365, G367-R388, L391, D392, I394, V395, W435, Q519-M520                                                                                                        | S3+S4              |
| C <sub>4</sub>  | F75, F78, S79, W84, D128, V129, F197-S200, L224, N225-C231, L320-V323, N324-L332, D389, D393, I401-V408, L420-A427, S428-E434, M436-F446, E461, R468-W473, K491, W492, K498-V518 | Ω-loop+S1+S2+S3+S4 |
| C <sub>5</sub>  | E484-S490                                                                                                                                                                        | /                  |
| C <sub>6</sub>  | S108-V113, N183-I196, A474-G480                                                                                                                                                  | /                  |
| C <sub>7</sub>  | S4-V8, V15-F30, N59-P64, I99-K107                                                                                                                                                | /                  |
| C <sub>8</sub>  | G169-D182, G207-R220, F300, N313-K315                                                                                                                                            | /                  |
| C <sub>9</sub>  | A201-V206                                                                                                                                                                        | /                  |
| C <sub>10</sub> | R221-I223, K316-I319, N409-Y419, N481-N483, P493-T497                                                                                                                            | /                  |
| C <sub>11</sub> | P232-S235                                                                                                                                                                        | S2                 |
| C <sub>12</sub> | R250, N251, N280-F292                                                                                                                                                            | S2                 |
| C <sub>13</sub> | C254-S258, E260-L262                                                                                                                                                             | S2                 |
| C <sub>14</sub> | S304-G312                                                                                                                                                                        | /                  |
| C <sub>15</sub> | N9-K14, L31-E37, P50-W58                                                                                                                                                         | /                  |
| C <sub>16</sub> | S354-L366, C521-A534                                                                                                                                                             | S3                 |
| C <sub>17</sub> | G396-V400                                                                                                                                                                        | S3                 |
| C <sub>18</sub> | V447-L450, P451-A460, E462-R467                                                                                                                                                  | S4                 |

## II

| #Community      | Residues                                                                                                                                               | Subdomains      |
|-----------------|--------------------------------------------------------------------------------------------------------------------------------------------------------|-----------------|
| C <sub>0</sub>  | N65, N66, C67-M90, G119-D128, Y130, S147, I275, S329-A336, K341                                                                                        | Ω-loop+S1+S2+S3 |
| C <sub>1</sub>  | L95-V101, L135-V150, G151                                                                                                                              | S1              |
| C <sub>2</sub>  | E37-R46, S91-C94, A152-A164, V238, E240-L274, D276-L282, V295                                                                                          | Ω-loop+ S2      |
| C <sub>3</sub>  | L332, P337-S340, D342-F352, L373-D392, L394-D397, E434-G437                                                                                            | S3+S4           |
| C <sub>4</sub>  | W114, V129, F197-S200, Q225-G227, L320-V323, N324-G328, D393, L404, Y419-A427, V438-L450, P451, L452, R467-W473, N483-P493, I503-H513, R517, Q519-C521 | S1+S2+S3+S4     |
| C <sub>5</sub>  | R47-K52, I296, D297-S304, E306-M308                                                                                                                    | S2              |
| C <sub>6</sub>  | D2-L6, R19-S28, P102-R105, N131-Y134                                                                                                                   | S1              |
| C <sub>7</sub>  | L7-T18, P53-P64                                                                                                                                        | /               |
| C <sub>8</sub>  | P106-V111, D182-I196                                                                                                                                   | /               |
| C <sub>9</sub>  | M112, V113, R221-L224, S228-C231, L309-I319, M405-T418, A474-P482, L494-T497                                                                           | S2              |
| C <sub>10</sub> | A29-A36                                                                                                                                                | /               |
| C <sub>11</sub> | I115-G118                                                                                                                                              | S1              |
| C <sub>12</sub> | P165-H181                                                                                                                                              | /               |
| C <sub>13</sub> | A201-S205                                                                                                                                              | /               |
| C <sub>14</sub> | V206-H209, T210-R220                                                                                                                                   | /               |
| C <sub>15</sub> | P232-S237                                                                                                                                              | S2              |
| C <sub>16</sub> | A239                                                                                                                                                   | S2              |
| C <sub>17</sub> | P283-I287, M353-T372, V522-A534                                                                                                                        | S2+S3           |
| C <sub>18</sub> | F288-P294                                                                                                                                              | S2              |
| C <sub>19</sub> | L305                                                                                                                                                   | /               |
| C <sub>20</sub> | K498-F502, Q514-V518                                                                                                                                   | /               |
| C <sub>21</sub> | H398-V400, I401-P403                                                                                                                                   | S3              |
| C <sub>22</sub> | S428-W432, V453-S466                                                                                                                                   | S4              |
| C <sub>23</sub> | P433                                                                                                                                                   | S4              |

### III

| #Community      | Residues                                                                                                                                                                                                                                                                                           | Subdomains                                            |
|-----------------|----------------------------------------------------------------------------------------------------------------------------------------------------------------------------------------------------------------------------------------------------------------------------------------------------|-------------------------------------------------------|
| C <sub>0</sub>  | Chain A: T62-N66, C67, Q69-E73, E82, N85-M90, D93, Y96-N98, W114, Y121-D128, S145-S147, Q272, E278, W279                                                                                                                                                                                           | Chain A: $\Omega$ -loop+S1+S2                         |
| C <sub>1</sub>  | Chain A: I99, W100, K133-V144                                                                                                                                                                                                                                                                      | Chain A: S1                                           |
| C <sub>2</sub>  | Chain A: P38-R46, Q68, S91, E92, C94, L95, G119, F120, Y148-V150, G151-V168, V236, R242-V277, N280-P283, S291, F292, I296                                                                                                                                                                          | Chain A: $\Omega$ -loop+S1+S2                         |
| C <sub>3</sub>  | Chain A: Q74-S81, M83, W84, I115-G118, V129-G132, F197-S200, L224, Q225-N230, F284-F290, L320-V323, N324-M353, K357-D369, Q374-D377, N382-V400, I401-F407, L420-A427, S428-F448, Y458-E462, R468-W473, N483-P493, K498-V522, W524-P529, L531, L532, A534;<br>Chain B: D365, L373, M379, D380, K530 | Chain A:<br>$\Omega$ -loop+S1+S2+S3+S4<br>Chain B: S3 |
| C <sub>4</sub>  | Chain A: G449-L450, P451-N457, E463-R467                                                                                                                                                                                                                                                           | Chain A: S4                                           |
| C <sub>5</sub>  | Chain A: S4-E37, E49-S61, V101-P106                                                                                                                                                                                                                                                                | /                                                     |
| C <sub>6</sub>  | Chain A: R47, G169-R174, S237-G241, V293-V295, D297-M308                                                                                                                                                                                                                                           | Chain A: S2                                           |
| C <sub>7</sub>  | Chain A: P48, K107-V113, M175-I196, R221-I223, A474-P482                                                                                                                                                                                                                                           | /                                                     |
| C <sub>8</sub>  | Chain A: A201-S205                                                                                                                                                                                                                                                                                 | /                                                     |
| C <sub>9</sub>  | Chain A: V206-R220                                                                                                                                                                                                                                                                                 | /                                                     |
| C <sub>10</sub> | Chain A: C231-S235                                                                                                                                                                                                                                                                                 | Chain A: S2                                           |
| C <sub>11</sub> | Chain A: L309-I319, V408-Y419, L494-T497                                                                                                                                                                                                                                                           | /                                                     |
| C <sub>12</sub> | Chain A: A370-L373;<br>Chain B: V522                                                                                                                                                                                                                                                               | Chain A: S3                                           |
| C <sub>13</sub> | Chain A: S354-V356;                                                                                                                                                                                                                                                                                | Chain A: S3                                           |
| C <sub>0'</sub> | Chain B: N66, Y70-R88, Y116-G118, S122-Y134, S145, E199, S200, L224, Q225-G227, L321-V323, N324-E327, F330, L420-A427, S428-W432, G437-L450, Y458-E462, R468, S490-F492, F502-H513, R515                                                                                                           | Chain B:<br>$\Omega$ -loop+S1+S2+S3+S4                |
| C <sub>1'</sub> | Chain B: I99-V101, P106-V113, W114, I115, A136-V144, W179-G198                                                                                                                                                                                                                                     | Chain B: S1                                           |
| C <sub>2'</sub> | Chain B: F35-K51, T62-N65, C67-Q69, E89-C94, L95-N98, L146-V150, G151-Q178, M208-R220, S237-F284, S291-I296, D297-F301, S311, N313,                                                                                                                                                                | Chain B: $\Omega$ -loop+ S1+S2                        |



|                       |                                                                                                                                       |                               |
|-----------------------|---------------------------------------------------------------------------------------------------------------------------------------|-------------------------------|
|                       | K315                                                                                                                                  |                               |
| <b>C<sub>3</sub></b>  | Chain A: F523<br>Chain B: D285-F288, G328, S329, F331-V360, H362, A363, G367, L368, T372, Q374-W378, D381-V395, P433-M436, M520, W524 | Chain B: S2+S3+ S4            |
| <b>C<sub>4</sub></b>  | Chain A: W378-D381<br>Chain B: S228-C231, G396-V400, I401-H406, V408, K498-K501, Q514, L516-Q519                                      | Chain A: S3<br>Chain B: S2+S3 |
| <b>C<sub>5</sub></b>  | Chain B: S4-P34, K52-S61, P102-R105                                                                                                   | /                             |
| <b>C<sub>6</sub></b>  | Chain B: S24, L135, P451-N457, E463-R467, I469-Y472                                                                                   | /                             |
| <b>C<sub>7</sub></b>  | Chain B: G119-Y121, R289, F290                                                                                                        | Chain B: S1+S2                |
| <b>C<sub>8</sub></b>  | Chain B: A201-G207                                                                                                                    | /                             |
| <b>C<sub>9</sub></b>  | Chain B: R221-I223, F314, K316-L320, F407, N409-Y419, W473-E489, P493-T497                                                            | /                             |
| <b>C<sub>10</sub></b> | Chain B: P232-V236                                                                                                                    | Chain B: S2                   |
| <b>C<sub>11</sub></b> | Chain B: P302-N310, G312                                                                                                              | /                             |
| <b>C<sub>12</sub></b> | Chain A: K530, N533<br>Chain B: P361, N364, L366, D369-V371, C521, F523, N525-P529, L531-A534                                         | Chain B: S3                   |

#### IV

| #Community           | Residues                                                                                                                                                                                                                  | Subdomains                          |
|----------------------|---------------------------------------------------------------------------------------------------------------------------------------------------------------------------------------------------------------------------|-------------------------------------|
| <b>C<sub>0</sub></b> | Chain A: T62-N66, C67-M90, Y116, G118-V129, N131-L135, S145-Y148, E199, R243, K270-L282, F290-F292                                                                                                                        | Chain A: Ω-loop+S1+S2               |
| <b>C<sub>1</sub></b> | Chain A: A136-V144                                                                                                                                                                                                        | Chain A: S1                         |
| <b>C<sub>2</sub></b> | Chain A: G154-Q162, P232-R242, R244-L266, E268, K269                                                                                                                                                                      | Chain A: S2                         |
| <b>C<sub>3</sub></b> | Chain A: G117, Y130, S200, Q225, S226, P283-R289, G322, V323, N324-M353, K357-A363, L368, V371, T372, Q374-D377, D380-V400, I401-H406, Y421-A427, S428-L450, P451-M470, S490, F502-Q514, L516-V522, N525<br>Chain B: L373 | Chain A: S1+S2+S3+S4<br>Chain B: S3 |
| <b>C<sub>5</sub></b> | Chain A: P106-I115, N183-G198, D217-R220, H471-T479                                                                                                                                                                       | /                                   |
| <b>C<sub>6</sub></b> | Chain A: D2-V8, V15-S28, W58-S61, P104, R105                                                                                                                                                                              | /                                   |

|                        |                                                                                                                                                                                                                |                                  |
|------------------------|----------------------------------------------------------------------------------------------------------------------------------------------------------------------------------------------------------------|----------------------------------|
| <b>C<sub>7</sub></b>   | Chain A: A29-K52, S91-C94, L95-S103, R149, V150, G151-F153, E163-A176, R267                                                                                                                                    | ChainA: $\Omega$ -loop+ S1+ S2   |
| <b>C<sub>8</sub></b>   | Chain A: S354-V356                                                                                                                                                                                             | Chain A: S3                      |
| <b>C<sub>9</sub></b>   | Chain A: L177, R216, R221-L224, V293-I296, D297-L321, F407-L420, L494-K501, R515                                                                                                                               | Chain A: S3                      |
| <b>C<sub>10</sub></b>  | Chain A: A201-S215                                                                                                                                                                                             | /                                |
| <b>C<sub>11</sub></b>  | Chain A: G227-C231                                                                                                                                                                                             | Chain A: S2                      |
| <b>C<sub>12</sub></b>  | Chain A: N364, L366, G367, F523, W524, Q526-N533<br>Chain B: D369, A370                                                                                                                                        | Chain A: S3<br>Chain B: S3       |
| <b>C<sub>13</sub></b>  | Chain A: N9-K14, P53-V57, Q178-D182                                                                                                                                                                            | /                                |
| <b>C<sub>14</sub></b>  | Chain A: G480-P493                                                                                                                                                                                             | /                                |
| <b>C<sub>0'</sub></b>  | Chain B: T62-N66, C67-M90, L97, G117-V129, S145-Y148, E199, L224, R244, Q272-W279, P283, F284, F290-F292                                                                                                       | Chain B: $\Omega$ -loop+ S1+ S2  |
| <b>C<sub>1'</sub></b>  | Chain B: A136-V144                                                                                                                                                                                             | Chain B: S1                      |
| <b>C<sub>2'</sub></b>  | Chain B: P34-K51, S91-C94, L95, Y96, R149, V150, G151-L177, C231-R243, A245-P271, N280-L282, V293-I296, D297-E299                                                                                              | Chain B: $\Omega$ -loop+ S1+ S2  |
| <b>C<sub>3'</sub></b>  | Chain A: L373, W378, M379<br>Chain B: Y116, S200, A201, Q225-N230, D285-R289, L321-V323, N324-H362, N364, G367, L368, V371, T372, Q374-V400, I401-H406, L420-A427, S428-L450, P451, L452, E462-W473, K498-N525 | Chain A: S3<br>Chain B: S2+S3+S4 |
| <b>C<sub>5'</sub></b>  | Chain B: P106-I115, Q178-G198                                                                                                                                                                                  | /                                |
| <b>C<sub>6'</sub></b>  | Chain B: D2-S61, N98-R105, Y130-L135                                                                                                                                                                           | Chain B: S1                      |
| <b>C<sub>7'</sub></b>  | Chain B: G202-R220, G312-K315                                                                                                                                                                                  | /                                |
| <b>C<sub>8'</sub></b>  | Chain B: R221-I223, K316-L320, V408-Y419, L494-T497                                                                                                                                                            | /                                |
| <b>C<sub>9'</sub></b>  | Chain B: F300-S311, F407                                                                                                                                                                                       | /                                |
| <b>C<sub>10'</sub></b> | Chain B: V453-E461                                                                                                                                                                                             | /                                |
| <b>C<sub>11'</sub></b> | Chain B: A474-K478                                                                                                                                                                                             | /                                |
| <b>C<sub>12'</sub></b> | Chain A: D365, D369, A370, A534<br>Chain B: A363, D365, L366, Q526-A534                                                                                                                                        | Chain A: S3<br>Chain B: S3       |
| <b>C<sub>13'</sub></b> | Chain B: T479-P493                                                                                                                                                                                             | /                                |
